# Supplementary material for: Treg and neutrophil extracellular trap interaction contributes to the development of immunosuppression in sepsis
Source: JCI journal article supplement (doi:10.1172/jci.insight.180132), 2024-06-18

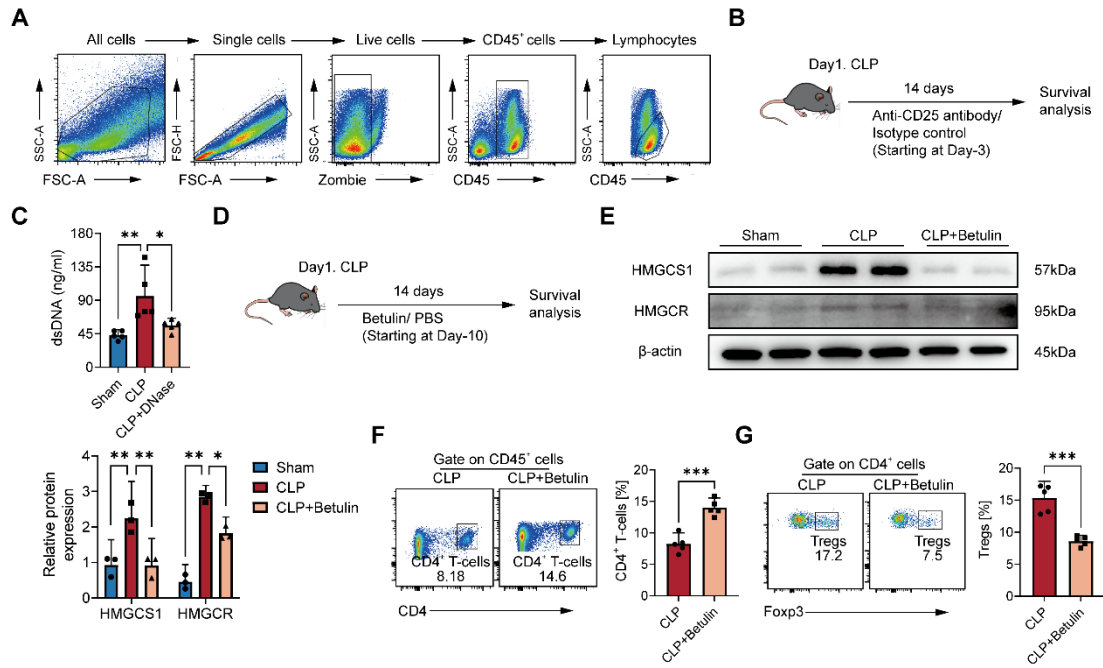

Supplementary Fig1. Analysis of lymphocytes in murine septic spleens

(A) Gating strategies of live lymphocytes in spleen and blood. (B) Immunization model of anti-CD25 antibody injection in CLP mice. (C) dsDNA levels in Sham, CLP mice treated with or without DNase (n=5). (D) Representative model of CLP mice treated with betulin. (E) Western blot images of HMGCS1 and HMGCR expression in CD4<sup>+</sup> T-cells. (F) Representative flow cytometric analysis of CD4<sup>+</sup> T-cells and (G) Treg of septic mice with betulin treatment (n=5). Each bar represents means ± 95%CI. Data comparison between two groups was analyzed by unpaired t-test. Statistical analysis for three or more groups was performed using one-way ANOVA. \*p < 0.05, \*\*p < 0.01, \*\*\*p < 0.001, \*\*\*\*p < 0.0001.

**Supplementary Table 1. Baseline characteristics of healthy controls (HC) and Sepsis patients.**

|                                       | <b>Healthy Control (N = 19)</b> | <b>ARDS (N=19)</b> | <b>P value</b> |
|---------------------------------------|---------------------------------|--------------------|----------------|
| <b>Gender (n, %)</b>                  |                                 |                    | 0.99           |
| <b>Male</b>                           | 11 (57.9%)                      | 10 (52.6%)         |                |
| <b>Female</b>                         | 8 (42.1%)                       | 9 (47.4%)          |                |
| <b>Ages (years)</b>                   | 52.53±15.40                     | 68.32±12.81        | 0.002          |
| <b>BMI (kg/m<sup>2</sup>)</b>         | 23.72±3.47                      | 22.66±3.24         | 0.335          |
| <b>Neutrophils (10<sup>9</sup>/L)</b> | 4.65±1.11                       | 9.64±5.76          | <0.05          |
| <b>Monocytes (10<sup>9</sup>/L)</b>   | 0.41±0.15                       | 0.51±0.44          | 0.315          |
| <b>Lymphocytes (10<sup>9</sup>/L)</b> | 1.80±0.49                       | 0.55±0.35          | <0.05          |
| <b>Platelets (10<sup>9</sup>/L)</b>   | 119.53±76.61                    | 213.95±45.99       | <0.05          |
| <b>Hemoglobin (g/L)</b>               | 140.63±10.78                    | 101.74±21.30       | <0.05          |
| <b>Albumin (g/L)</b>                  | 39.68±3.48                      | 29.11±3.91         | <0.05          |
| <b>CRP (mg/L)</b>                     | 2.76±3.00                       | 55.04±24.94        | <0.05          |

Data are expressed as n (%), mean ± SD or median (interquartile range[IQR]).

BMI: body mass index.

**Supplementary Table 2. Primer sequence of q-PCR.**

| <b>Gene</b>                | <b>Forward</b>         | <b>Reverse</b>        |
|----------------------------|------------------------|-----------------------|
| <b>Mouse-<i>Srebf2</i></b> | TGGGCGATGAGCTGACTCT    | CAAATCAGGGAACTCTCCCAC |
| <b>Mouse-<i>Hmgcr</i></b>  | TG TTCACCGGCAACAACAAGA | CCGCGTTATCGTCAGGATGA  |
| <b>Mouse-<i>Hmgcs1</i></b> | CGGATCGTGAAGACATCAACTC | CGCCCAATGCAATCATAGGAA |
| <b>Mouse-<i>Sqle</i></b>   | GACCTCGTTCGTGACGGAC    | CTCCCCAACTATCCTGTCGG  |
| <b>Mouse-<i>Gapdh</i></b>  | AGGTCGGTGTGAACGGATTTG  | GGGGTCGTTGATGGCAACA   |

Full unedited gel for Figure 4.

C

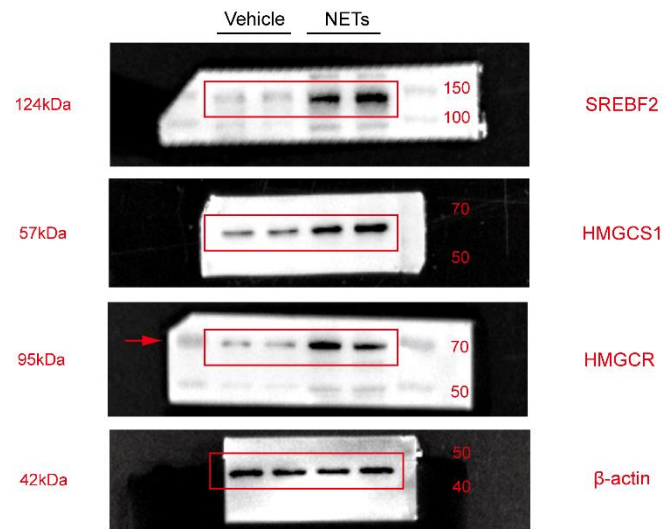

Full unedited gel for Figure 5.

D

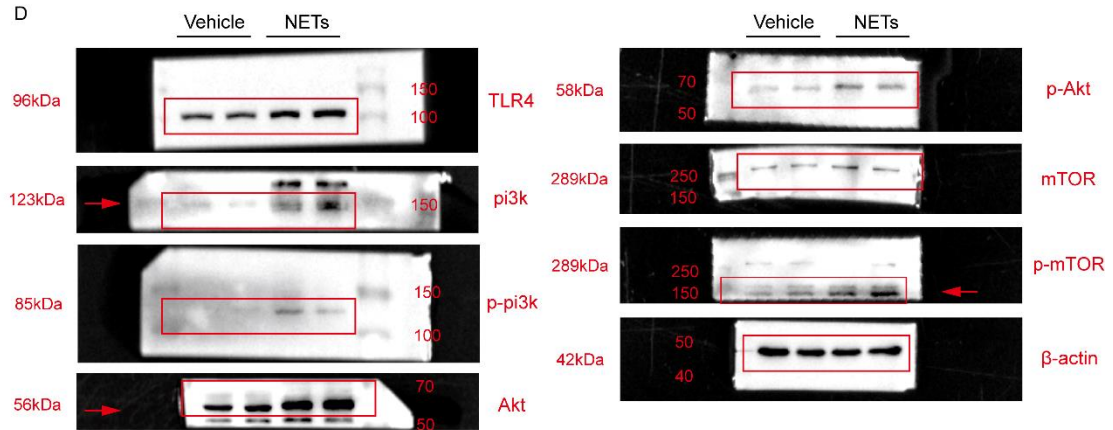

Full unedited gel for Figure 5.

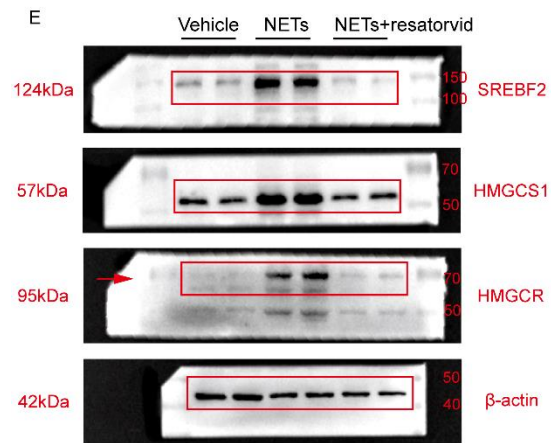

Full unedited gel for Figure 7.

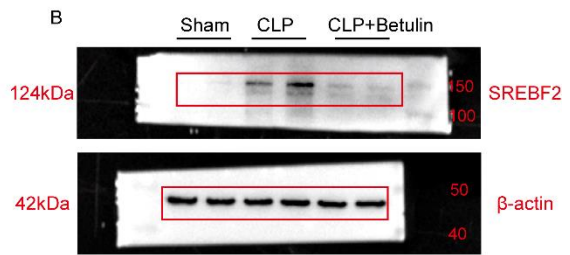

Full unedited gel for Supplement Figure S1.

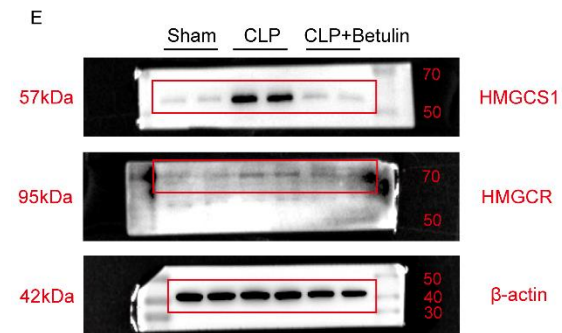

Supplement: sd1 [file 1]
